# Supplementary material
Source: PubMed Central journal article supplement (PMC7752140)

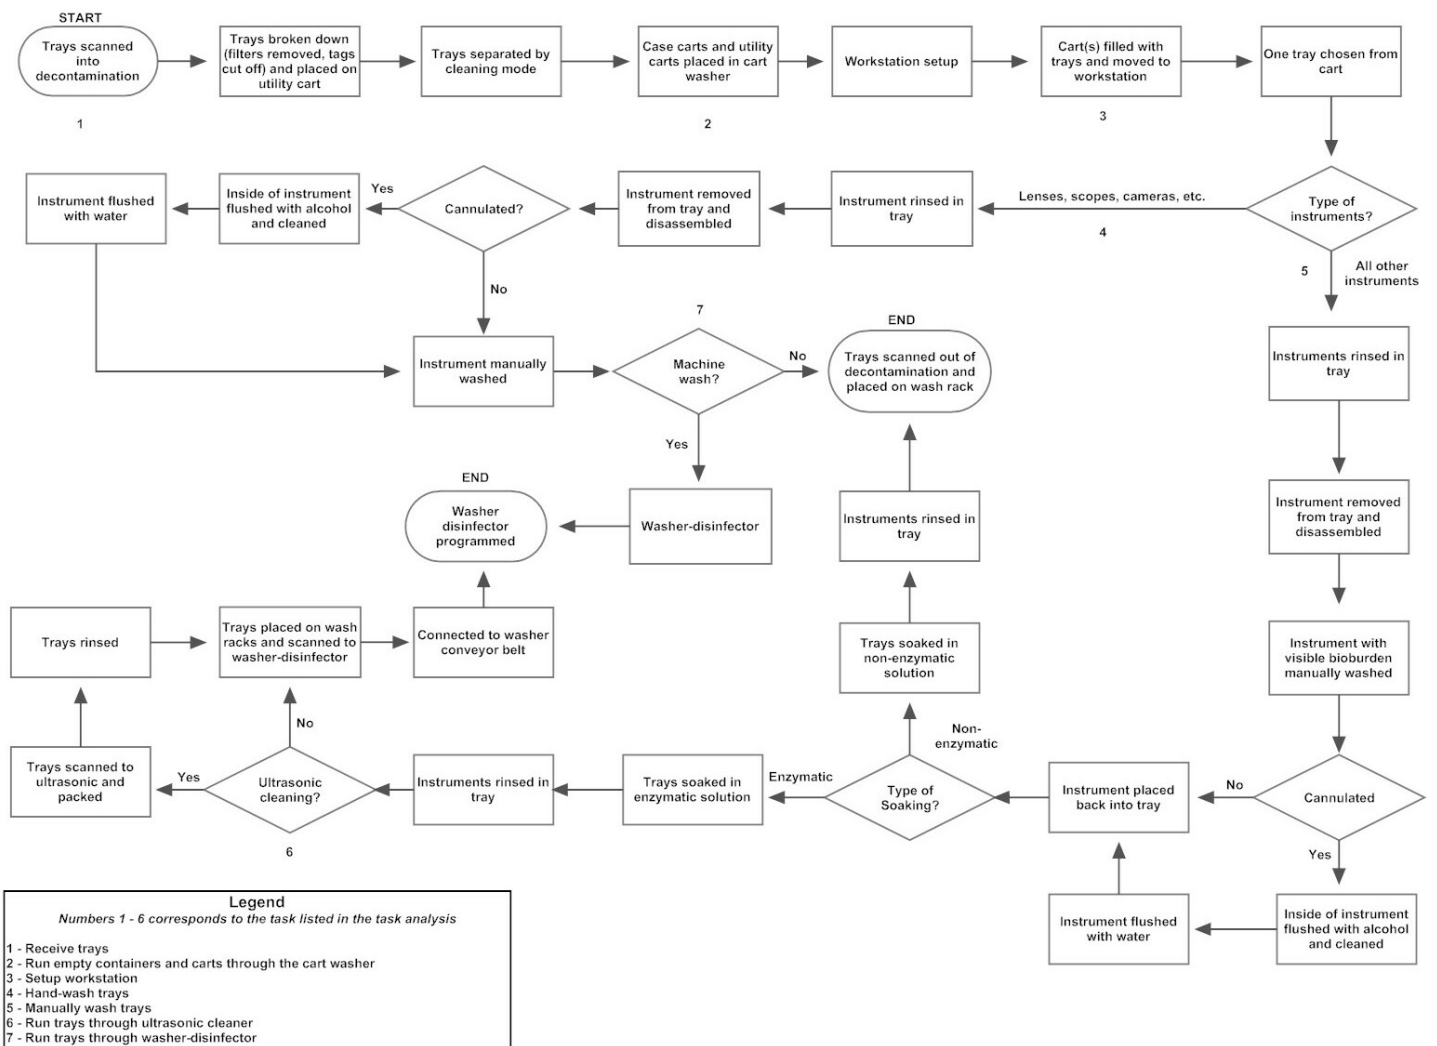

Supplement: NIHMS1581783-supplement-Supplementary_Figure_1.pdf [file NIHMS1581783-supplement-Supplementary_Figure_1.pdf]

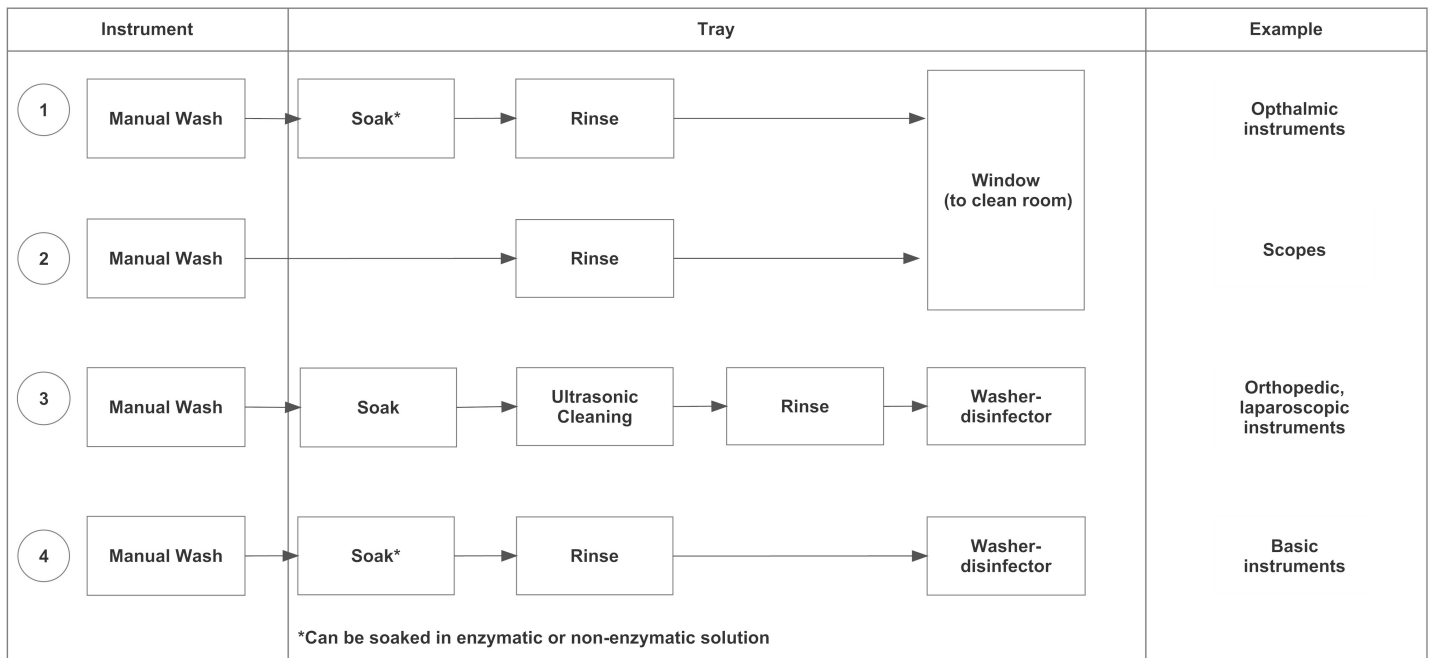

Supplement: NIHMS1581783-supplement-Supplementary_Figure_2.pdf [file NIHMS1581783-supplement-Supplementary_Figure_2.pdf]
